# Supplementary material for: Whole Genome Sequencing of Aggregatibacter actinomycetemcomitans Cultured from Blood Stream Infections Reveals Three Major Phylogenetic Groups Including a Novel Lineage Expressing Serotype a Membrane O Polysaccharide
Source: PubMed Central journal article supplement (PMC6963875; doi:10.3390/pathogens8040256), 2019-11-22
Supplement: pathogens-08-00256-s001.pdf [file pathogens-08-00256-s001.pdf]

| Strain                                                                                                                             | St <sup>a</sup> | Clade <sup>b</sup> | Lineage <sup>c</sup> | Host characteristics                        | Origin                | Accession No   | Study      |
|------------------------------------------------------------------------------------------------------------------------------------|-----------------|--------------------|----------------------|---------------------------------------------|-----------------------|----------------|------------|
| NCTC_9710 <sup>T</sup> =ATCC_33384 <sup>T</sup> =CCUG_13227 <sup>T</sup> =DSM_8324 <sup>T</sup> =HK_443 <sup>T</sup> , type strain |                 |                    |                      |                                             | Abscess, Denmark 1955 | VSDU00000000   |            |
| PN_434                                                                                                                             | c               | c                  | I                    | Bacteremia                                  | Denmark 1999          | VSDV00000000   | This study |
| PN_565                                                                                                                             | c               | c                  | I                    | Bacteremia                                  | Denmark 1998          | VSEE00000000   | This study |
| PN_566                                                                                                                             | c               | c                  | I                    | Bacteremia                                  | Denmark 1992          | VSEF00000000   | This study |
| PN_628                                                                                                                             | c               | c                  | I                    | Bacteremia                                  | Denmark 2015          | VSEI00000000   | This study |
| PN_686                                                                                                                             | c               | c                  | I                    | Bacteremia                                  | Denmark 2011          | VSEM00000000   | This study |
| PN_694                                                                                                                             | c               | c                  | I                    | Bacteremia                                  | Denmark 2008          | VSEP00000000   | This study |
| PN_708                                                                                                                             | c               | c                  | I                    | Bacteremia                                  | Denmark 2012          | VSEQ00000000   | This study |
| PN_728                                                                                                                             | c               | c                  | I                    | Bacteremia                                  | Denmark 2012          | VSER00000000   | This study |
| PN_773                                                                                                                             | c               | c                  | I                    | Bacteremia                                  | Denmark 2013          | VSEV00000000   | This study |
| PN_796                                                                                                                             | c               | c                  | I                    | Bacteremia                                  | Denmark 2002          | VSEW00000000   | This study |
| HK1651                                                                                                                             | b               | b                  | I                    | Localized aggressive periodontitis          | Denmark 1995          | CP007502.1     | [30]       |
| PN_435                                                                                                                             | b               | b                  | I                    | Bacteremia                                  | Denmark 2006          | VSDW00000000   | This study |
| PN_436                                                                                                                             | b               | b                  | I                    | Bacteremia                                  | Denmark 2008          | VSDX00000000   | This study |
| PN_438                                                                                                                             | b               | b                  | I                    | Bacteremia                                  | Denmark 2011          | VSDZ00000000   | This study |
| PN_439                                                                                                                             | b               | b                  | I                    | Bacteremia                                  | Denmark 2013          | VSEA00000000   | This study |
| PN_627                                                                                                                             | b               | b                  | I                    | Bacteremia                                  | Denmark 2013          | VSEH00000000   | This study |
| PN_647                                                                                                                             | b               | b                  | I                    | Bacteremia                                  | Denmark 2012          | VSEJ00000000   | This study |
| PN_648                                                                                                                             | b               | b                  | I                    | Bacteremia                                  | Denmark 2012          | VSEK00000000   | This study |
| PN_684                                                                                                                             | b               | b                  | I                    | Bacteremia                                  | Denmark 2010          | VSEL00000000   | This study |
| PN_687                                                                                                                             | b               | b                  | I                    | Bacteremia                                  | Denmark 2012          | VSEN00000000   | This study |
| PN_738                                                                                                                             | b               | b                  | I                    | Bacteremia                                  | Denmark 2015          | VSES00000000   | This study |
| PN_756                                                                                                                             | b               | b                  | I                    | Bacteremia                                  | Denmark 2013          | VSEU00000000   | This study |
| PN_437                                                                                                                             | a               | a/d                | II                   | Bacteremia                                  | Denmark 2008          | VSDY00000000   | This study |
| PN_559                                                                                                                             | a               | a/d                | II                   | Bacteremia                                  | Denmark 1994          | VSEB00000000   | This study |
| PN_563                                                                                                                             | a               | a/d                | II                   | Bacteremia                                  | Denmark 2007          | VSED00000000   | This study |
| PN_567                                                                                                                             | a               | a/d                | II                   | Bacteremia                                  | Denmark 2014          | VSEG00000000   | This study |
| PN_688                                                                                                                             | a               | a/d                | II                   | Bacteremia                                  | Denmark 2012          | VSEO00000000   | This study |
| PN_740                                                                                                                             | a               | a/d                | II                   | Bacteremia                                  | Denmark 2006          | VSET00000000   | This study |
| D7S-1                                                                                                                              | a               | a/d                | II                   | Generalized aggressive periodontitis        | USA before 2002       | CP003496.2     | [22]       |
| I63B                                                                                                                               | d               | a/d                | II                   | Periodontally healthy subject               | USA before 2000       | AEJL00000000   | [31]       |
| A160                                                                                                                               | e               | e/f                | II                   | Chronic periodontitis                       | Finland 1995          | AJME00000000   | [31]       |
| D18P-1                                                                                                                             | f               | e/f                | II                   | Generalized aggressive periodontitis        | USA before 2000       | AEJO00000000   | [31]       |
| NUM4039                                                                                                                            | g               | -                  | II                   | Chronic periodontitis                       | Japan before 2010     | AP014520       | [32]       |
| PN_696                                                                                                                             | a               | -                  | III                  | Bacteremia                                  | Denmark 2010          | CP043005       | This study |
| HK_907                                                                                                                             | a               | -                  | III                  | (HG1185, T. J. M. van Steenberg)            | Holland before 1994   | CP043003       | [8]        |
| HK_973                                                                                                                             | nt              | -                  | III                  | Subgingival plaque, periodontal disease     | Denmark 1991          | CP043004       | [8]        |
| HK_974                                                                                                                             | a               | -                  | III                  | (JC291-6, Jan Carlsson)                     | Sweden before 1994    | VSDS00000000   | [8]        |
| HK_1710                                                                                                                            | a               | -                  | III                  | Unknown                                     | Brazil before 2007    | VSDR00000000   | This study |
| K51                                                                                                                                | a               | -                  | III                  | Periodontal pocket                          | Kenya 2016            | VSDT00000000   | This study |
| PN_561                                                                                                                             | e               | e'                 | (outgroup)           | Bacteremia                                  | Denmark 2005          | VSEC00000000   | This study |
| SC1083                                                                                                                             | e               | e'                 | (outgroup)           | Presumably a periodontally diseased subject | USA before 2010       | AEJM00000000.1 | [13]       |

<sup>a</sup> Serotype, mostly investigated by PCR; <sup>b</sup> Clade according to Kittichotirat 2016; <sup>c</sup> Lineage according to this study

## Table S2. Lineage-specific genes (annotated by PROKKA)

### Lineage I; 22 study strains including the type, 1 reference sequence

Lineage-specific genes, N=37

Hypothetical: 23

Annotated: 14

Acetolactate synthase isozyme 2 large subunit

Chorismate pyruvate-lyase

Dephospho-CoA kinase

DNA ligase

DNA topoisomerase 1

GDP-mannose 4,6-dehydratase

Glutamate 5-kinase

L-threonine dehydratase biosynthetic IlvA

L-threonine dehydratase biosynthetic IlvA

Opacity-associated protein OapA

Putative racemase YgeA

Signal recognition particle receptor FtsY

Stringent starvation protein B

tRNA-Val(tac)

### Lineage II; 6 study strains, 5 reference sequences

Lineage-specific genes, N=89

Hypothetical: 73

Annotated: 16

Antitoxin HigA

Cell division protein FtsZ

Chaperone protein YcdY

Chorismate pyruvate-lyase

Cold shock-like protein CspC

CRISPR pre-crRNA endoribonuclease Cas5d

Dephospho-CoA kinase

Endoribonuclease HigB

Histidine biosynthesis bifunctional protein HisIE

Membrane sensor protein UhpC

Multidrug resistance protein MdtA

NADH dehydrogenase

Ribosomal protein S12 methylthiotransferase RimO

Swarming motility protein SwrC

Tyrosine recombinase XerC

Tyrosine-specific transport protein

### Lineage III; 6 study strains

Lineage-specific genes, N=81

Hypothetical: 61

Annotated: 20

5-formyltetrahydrofolate cyclo-ligase

Beta-galactosidase

Beta-hexosaminidase

Chorismate pyruvate-lyase

CRISPR-associated endoribonuclease Cas2

CRISPR-associated exonuclease Cas4/endonuclease Cas1 fusion

Dephospho-CoA kinase

Ferrichrome outer membrane transporter/phage receptor

Glutamate racemase

IMPACT family member YigZ

Putative fluoride ion transporter CrcB

putative protein

putative protein/HI\_1462.1

putative tRNA/rRNA methyltransferase

putative tRNA/rRNA methyltransferase YfiF

Regulatory protein RecX

Rhomboid protease GlpG

Ribosome-associated ATPase

Sulfur acceptor protein CsdE

Thymidylate kinase
